# Supplementary material
Source: PubMed Central journal article supplement (PMC4604566)
Supplement: NIHMS697427-supplement-2.pdf [file NIHMS697427-supplement-2.pdf]

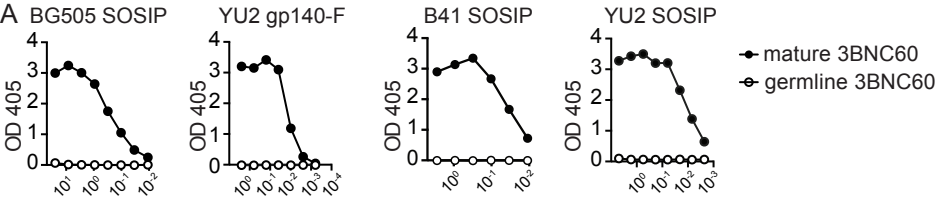

**B**

| Tier:           |         | 1            |                  |              |              | 2                |                |                 |                  |                 |                  |  |
|-----------------|---------|--------------|------------------|--------------|--------------|------------------|----------------|-----------------|------------------|-----------------|------------------|--|
| Clade:          | Contrl. | B            | A                | D            | A            | A                | A              | A               | A                | B               | B                |  |
| Virus:          | MuLV    | HxBc2.<br>DG | BG505/T<br>332N  | T247-23      | 62357.<br>14 | Q842.<br>d12     | 0330.<br>v4.c3 | 3365.<br>v2.c30 | Q769-<br>D22     | REJO<br>4541.67 | YU2.DG           |  |
| 3BNC60 mature   | >50     | <b>0.099</b> | <b>&lt;0.023</b> | <b>0.043</b> | <b>0.058</b> | <b>&lt;0.023</b> | <b>0.063</b>   | <b>0.025</b>    | <b>&lt;0.023</b> | <b>0.050</b>    | <b>&lt;0.023</b> |  |
| 3BNC60 germline | >50     | >50          | >50              | >50          | >50          | >50              | >50            | >50             | >50              | >50             | >50              |  |

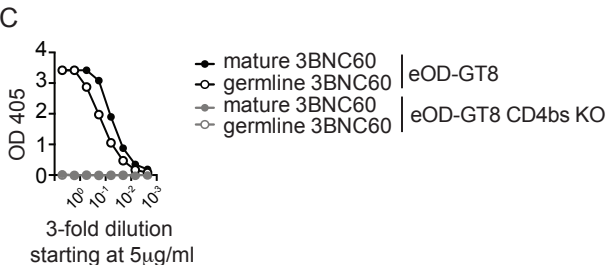

Figure S2
