# Supplementary material
Source: PubMed Central journal article supplement (PMC4604566)
Supplement: NIHMS697427-supplement-5.pdf [file NIHMS697427-supplement-5.pdf]

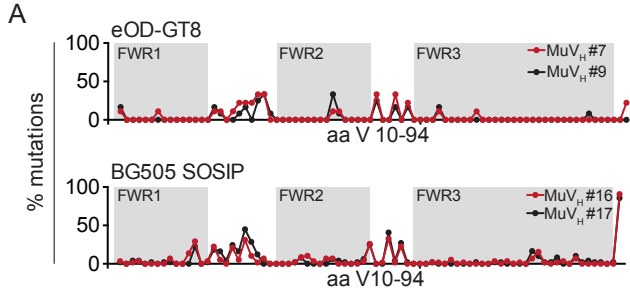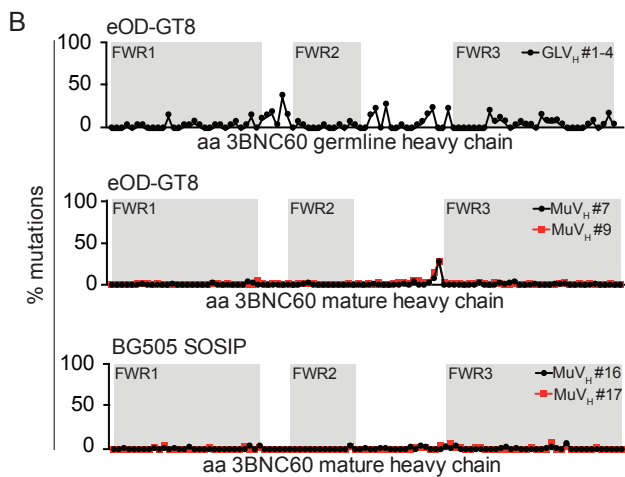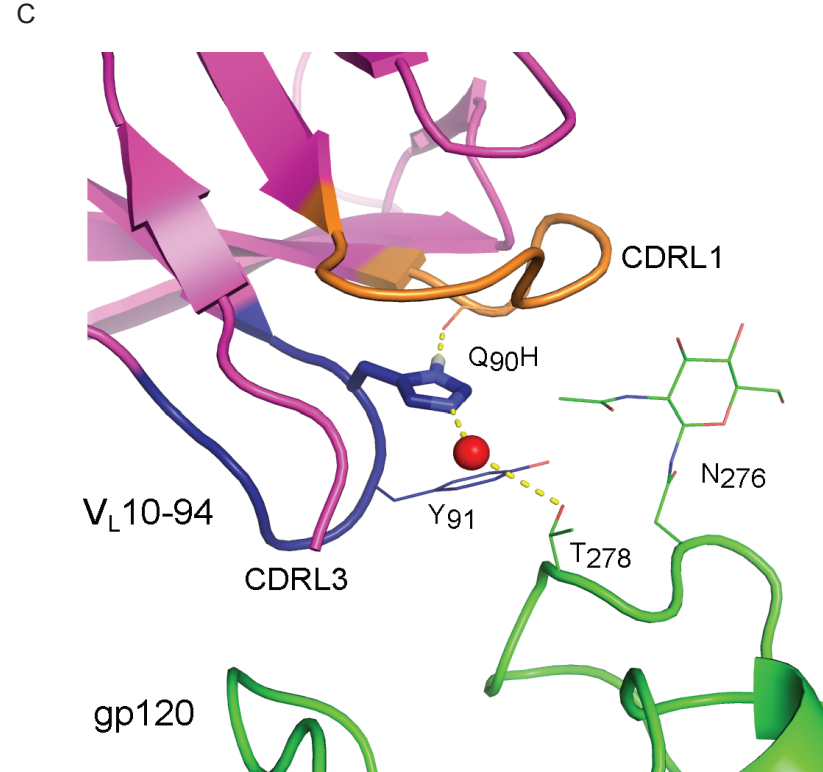

**D** 3BNC60 germline heavy chain sequence

| (a/t) <u>a</u><br>wa |                | t(a/t)<br>tw |                | (a/g)g(c/t)(a/t)<br>rgyw |                | (a/t)(a/g)c(c/t)<br>wrgy |                |
|----------------------|----------------|--------------|----------------|--------------------------|----------------|--------------------------|----------------|
| Motif                | Localization   | Motif        | Localization   | Motif                    | Localization   | Motif                    | Localization   |
| aa                   | 37-38 (FR1)    | tt           | 75-76 (FR1)    | agct                     | 8-11 (FR1)     | agct                     | 8-11 (FR1)     |
| aa                   | 40-41 (FR1)    | ta           | 82-83 (CDR1)   | ggct                     | 24-27 (FR1)    | agcc                     | 41-44 (FR1)    |
| aa                   | 58-59 (FR1)    | tt           | 88-89 (CDR1)   | ggct                     | 72-75 (FR1)    | tact                     | 109-112 (CDR1) |
| aa                   | 70-71 (FR1)    | ta           | 109-110 (CDR1) | ggct                     | 106-109 (CDR1) | aaacc                    | 169-172 (CDR2) |
| ta                   | 82-83 (CDR1)   | ta           | 112-113 (CDR1) | ggct                     | 146-149 (FR2)  | aaat                     | 196-199 (FR3)  |
| ta                   | 109-110 (CDR1) | ta           | 114-115 (CDR1) | ggca                     | 190-193 (CDR2) | agcc                     | 258-261 (FR3)  |
| ta                   | 112-113 (CDR1) | tt           | 149-150 (FR2)  | agtt                     | 209-212 (FR3)  | agct                     | 269-272 (FR3)  |
| ta                   | 114-115 (CDR1) | ta           | 174-175 (CDR2) | ggca                     | 220-223 (FR3)  | tact                     | 307-310 (FR3)  |
| aa                   | 143-144 (FR2)  | ta           | 199-200 (FR3)  | agca                     | 253-256 (FR3)  |                          |                |
| aa                   | 169-170 (CDR2) | tt           | 211-212 (FR3)  | agct                     | 269-272 (FR3)  |                          |                |
| ta                   | 174-175 (CDR2) | ta           | 262-263 (FR3)  | agca                     | 274-277 (FR3)  |                          |                |
| aa                   | 195-196 (CDR2) | ta           | 304-305 (FR3)  | ggct                     | 278-281 (FR3)  |                          |                |
| ta                   | 199-200 (FR3)  | tt           | 306-307 (FR3)  |                          |                |                          |                |
| aa                   | 208-209 (FR3)  |              |                |                          |                |                          |                |
| ta                   | 262-263 (FR3)  |              |                |                          |                |                          |                |
| ta                   | 304-305 (FR3)  |              |                |                          |                |                          |                |
| ta                   | 307-308 (FR3)  |              |                |                          |                |                          |                |

3BNC60 mature heavy chain sequence

| (a/t) <u>a</u><br>wa |                             | t(a/t)<br>tw |                             | (a/g)g(c/t)(a/t)<br>rgyw |                             | (a/t)(a/g)c(c/t)<br>wrgy |                              |
|----------------------|-----------------------------|--------------|-----------------------------|--------------------------|-----------------------------|--------------------------|------------------------------|
| Motif                | Localization                | Motif        | Localization                | Motif                    | Localization                | Motif                    | Localization                 |
| aa                   | 37-38 (FR1)                 | tt           | 75-76 (FR1)                 | agct                     | 8-11 (FR1)                  | agct                     | 8- <del>X</del> (FR1)        |
| aa                   | 40-41 (FR1)                 | ta           | 82-83 (CDR1)                | ggct                     | 24-27 (FR1)                 | agcc                     | 41-44 (FR1)                  |
| aa                   | <del>X</del> 58-59 (FR1)    | tt           | <del>X</del> 88-89 (CDR1)   | ggct                     | 72-75 (FR1)                 | tact                     | 109- <del>X</del> 112 (CDR1) |
| aa                   | <del>X</del> 70-71 (FR1)    | ta           | <del>X</del> 109-110 (CDR1) | ggct                     | 106-109 (CDR1)              | aaacc                    | 169- <del>X</del> 172 (CDR2) |
| ta                   | 82-83 (CDR1)                | ta           | 112-113 (CDR1)              | ggct                     | 146-149 (FR2)               | aaat                     | 196- <del>X</del> 199 (FR3)  |
| ta                   | <del>X</del> 109-110 (CDR1) | ta           | 114-115 (CDR1)              | ggca                     | 190-193 (CDR2)              | agcc                     | 258- <del>X</del> 261 (FR3)  |
| ta                   | <del>X</del> 112-113 (CDR1) | tt           | 149-150 (FR2)               | agtt                     | 209- <del>X</del> 212 (FR3) | agct                     | 269- <del>X</del> 272 (FR3)  |
| ta                   | 114-115 (CDR1)              | ta           | 174-175 (CDR2)              | ggca                     | 220-223 (FR3)               | tact                     | 307- <del>X</del> 310 (FR3)  |
| aa                   | <del>X</del> 143-144 (FR2)  | ta           | 199- <del>X</del> 200 (FR3) | agca                     | 253- <del>X</del> 256 (FR3) |                          |                              |
| aa                   | 169-170 (CDR2)              | tt           | 211-212 (FR3)               | agct                     | 269- <del>X</del> 272 (FR3) |                          |                              |
| ta                   | 174-175 (CDR2)              | ta           | 262- <del>X</del> 263 (FR3) | agca                     | 274- <del>X</del> 277 (FR3) |                          |                              |
| aa                   | 195-196 (CDR2)              | ta           | 304- <del>X</del> 305 (FR3) | ggct                     | 278- <del>X</del> 281 (FR3) |                          |                              |
| ta                   | 199-200 (FR3)               | tt           | 306-307 (FR3)               |                          |                             |                          |                              |
| aa                   | 208- <del>X</del> 209 (FR3) |              |                             |                          |                             |                          |                              |
| ta                   | 262- <del>X</del> 263 (FR3) |              |                             |                          |                             |                          |                              |
| ta                   | 304- <del>X</del> 305 (FR3) |              |                             |                          |                             |                          |                              |
| ta                   | 307- <del>X</del> 308 (FR3) |              |                             |                          |                             |                          |                              |

Figure S5
