# Supplementary material
Source: PubMed Central journal article supplement (PMC4604566)

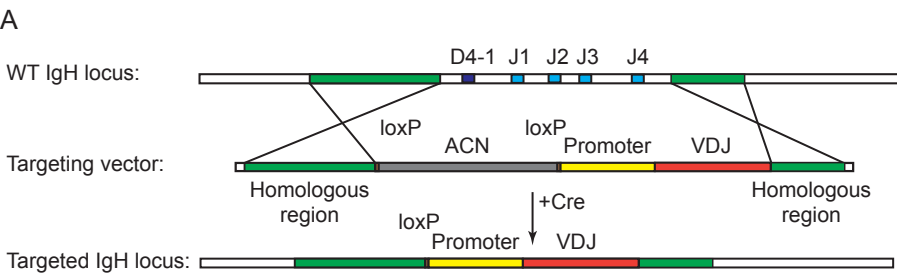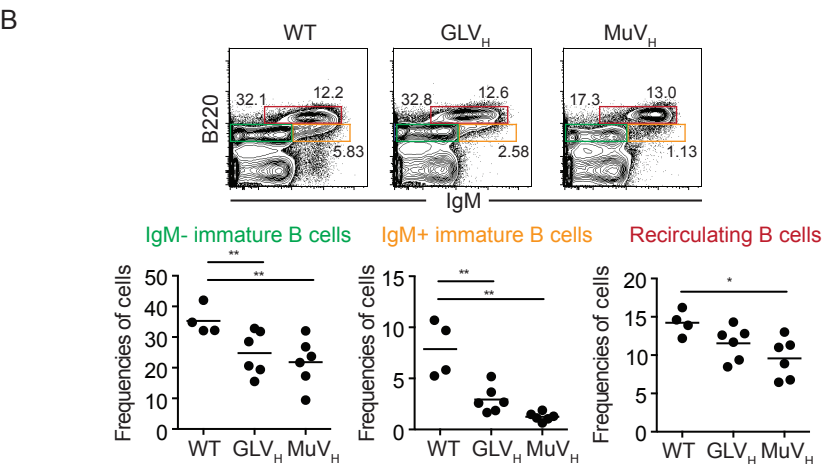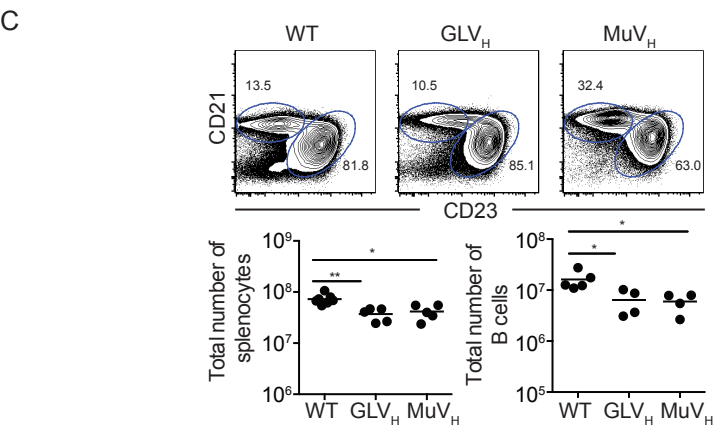

Figure S1

Supplement: NIHMS697427-supplement-1.pdf [file NIHMS697427-supplement-1.pdf]

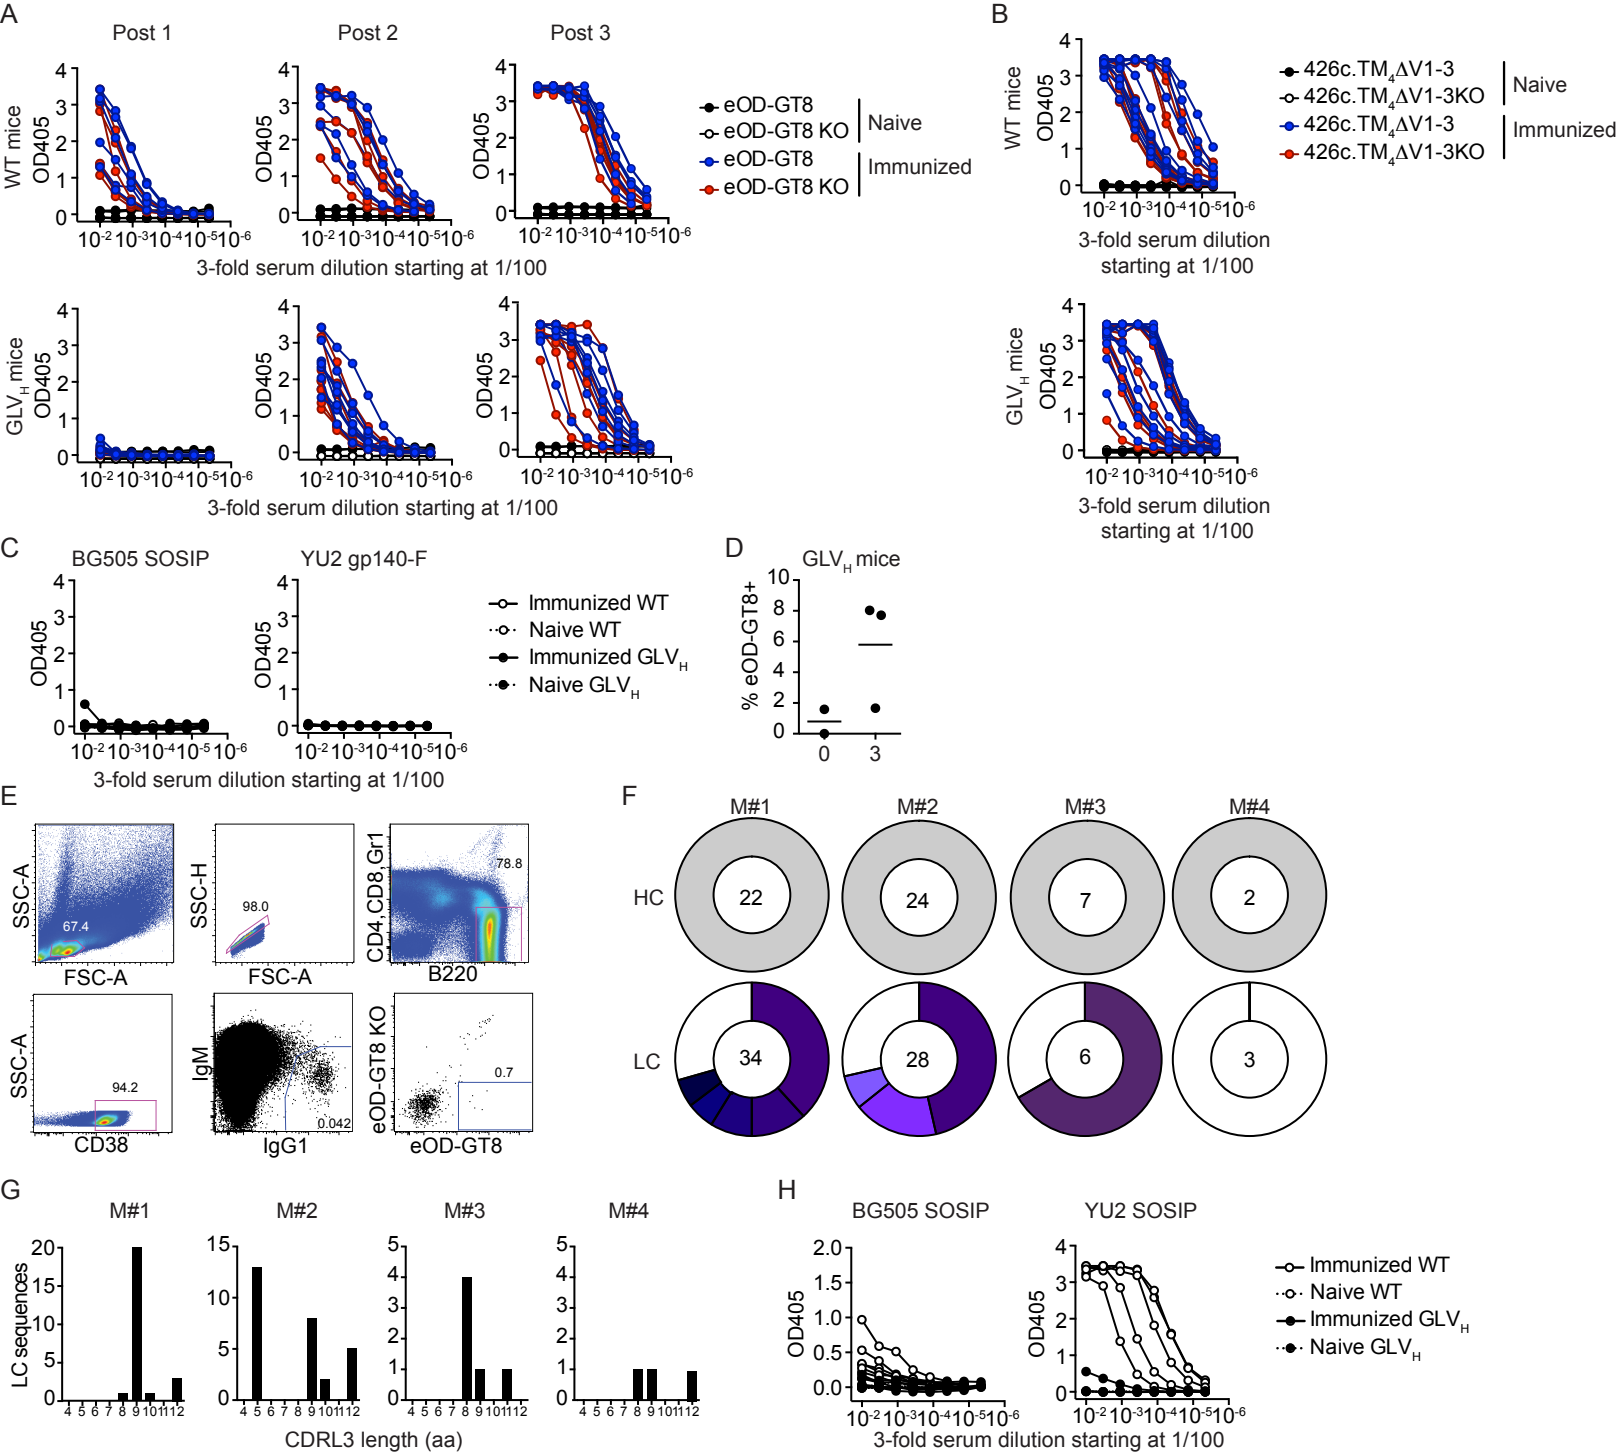

Figure S3

Supplement: NIHMS697427-supplement-3.pdf [file NIHMS697427-supplement-3.pdf]

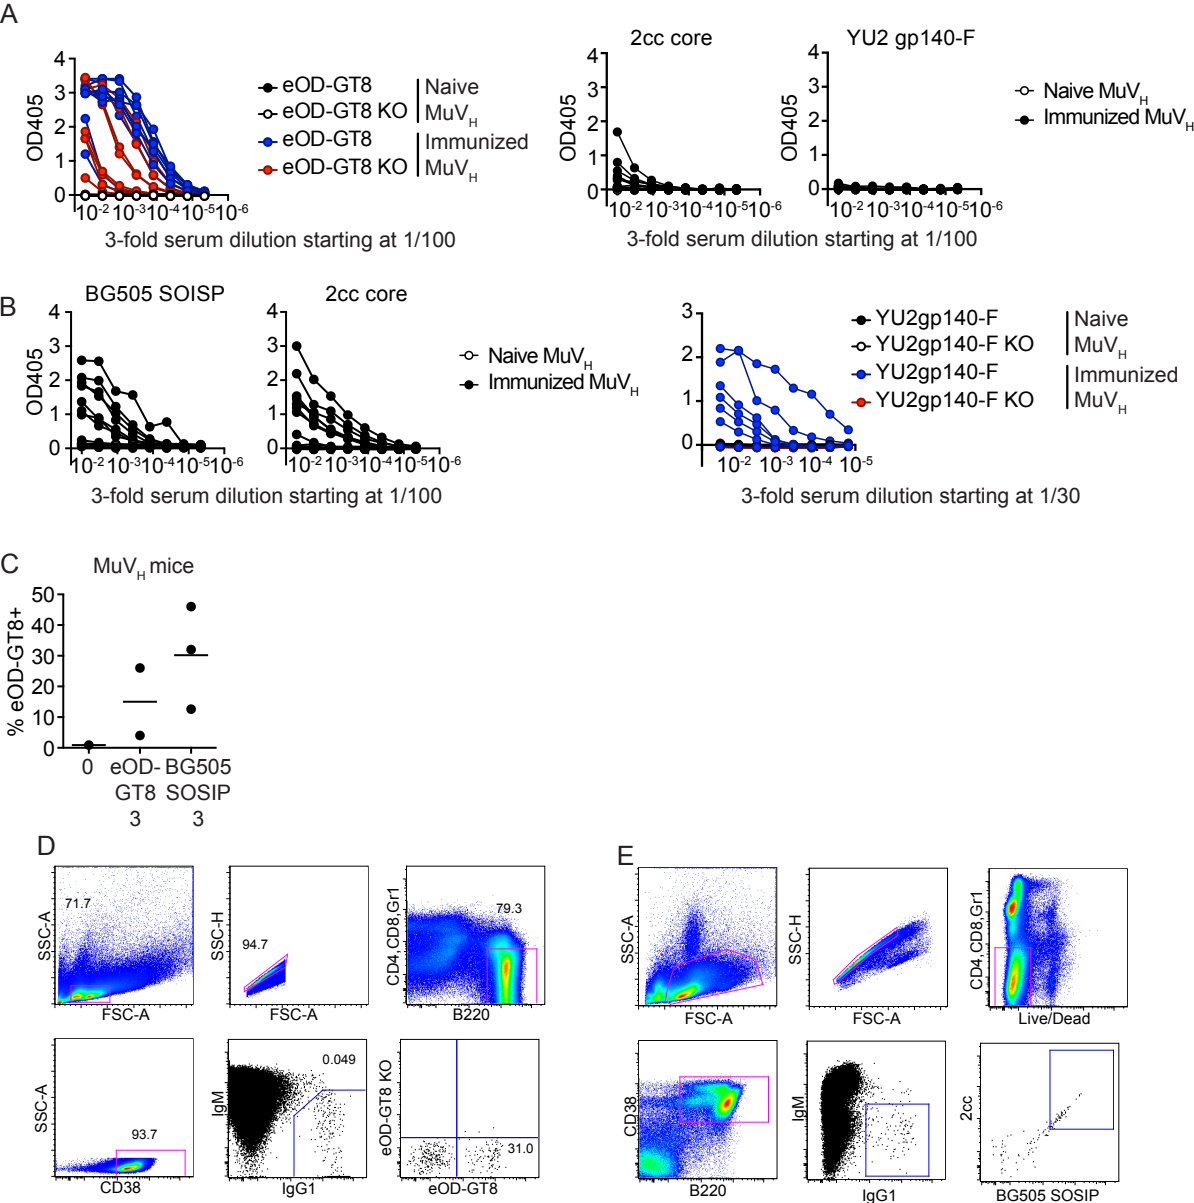

Figure S4

Supplement: NIHMS697427-supplement-4.pdf [file NIHMS697427-supplement-4.pdf]
